# Supplementary material for: A highly efficient titanium-based olefin polymerisation catalyst with a monoanionic iminoimidazolidide π-donor ancillary ligandElectronic supplementary information (ESI) available: experimental, spectroscopic and polymerisation details. See http://www.rsc.org/suppdata/cc/b1/b111343g/ Netherlands Institute for Catalysis Research (NIOK) publication no. RUG 01-4-05.
Source: Royal Society of Chemistry journal article supplement (doi:10.1039/b111343g), 2002-02-25
Supplement: b111343g.doc [file b111343g.doc]

# Supplementary material

**A highly efficient titanium-based olefin polymerisation catalyst with a monoanionic imino-imidazolidide -donor ancillary ligand**

Winfried Kretschmer*, Chris Dijkhuis, Auke Meetsma, Bart Hessen and Jan H. Teuben

Dutch Polymer Institute / Centre for Catalytic Olefin Polymerisation, Stratingh Institute of Chemistry and Chemical Engineering, University of Groningen, Nijenborgh 4, 9747 AG Groningen, The Netherlands

E-mail: kretschmer@chem.rug.nl

**The following abbreviations are used:**

Me - Methyl (CH3)

*n*-Bu - *normal*-Butyl (CH3CH2CH2CH2)

*i*-Bu - *iso*-Butyl (Me2CHCH2)

*t*-Bu - *tert*-Butyl (Me3C)

Ph - Phenyl (C6H5)

Cp - Cyclopentadienyl (C5H5)

1,3-Ph2C2H4N2C=NH - 1,3-Di-phenyl-2-imino-imidazolidine

1,3-(2,6-Me2C6H3)2C2H4N2C=NH - 1,3-Bis-(2’,6’-dimethylphenyl)-2-imino-

imidazolidine

*i*-Bu3Al - Tri-*iso*-butylaluminium (TIBA)

[(*i*-Bu2Al)2O]n - Tetra-*iso*-butylalumoxane (TIBAO)

**General Considerations**

All experiments were performed under a nitrogen atmosphere using standard Schlenk techniques. Toluene and hexane (Aldrich, anhydrous, 99.8%) was passed over columns of Al2O3 (Fluka), BASF R3-11 supported Cu oxygen scavenger and molecular sieves (Aldrich, 4Å). Diethyl ether and THF (Aldrich, anhydrous, 99.8%) were dried over Al2O3 (Fluka) and the other solvents (Aldrich, anhydrous, 99.8%) were dried over molecular sieves (Aldrich 4Å). All solvents were degassed before use. Ethene and propene (AGA polymer grade) were passed over BASF R3-11 supported Cu oxygen scavenger and molecular sieves (Aldrich, 4Å). 1-Hexene and styrene (Acros) were dried over CaH2 and distilled before use. Tri-*iso*-butylaluminium (Witco) was used as received.

NMR spectra were recorded on a Varian Gemini 200 (1H: 200 MHz, 13C: 50.3 MHz, 31P: 202.7 MHz, 19F: 471.0 MHz) or Varian VXR-300 (1H: 300 MHz, 13C: 75.4 MHz) spectrometer. The 1H and 13C NMR spectra, measured at 25°C, were referenced internally using the residual solvent resonances, and the chemical shifts () reported in ppm. IR spectra were recorded as Nujol mulls between KBr discs on a Mattson Galaxy 4020 FTIR spectrophotometer. Gel permeation chromatography (GPC) analysis was carried out on a Polymer Laboratories Ltd. (PL-GPC210) chromatograph using 1,2,4-trichlorobenzene as the mobile phase at 135°C. The samples were prepared by dissolving the polymer in the mobile phase solvent in an external oven at 0.1% (weight/volume) and were run without filtration. The molecular weight was referenced to polyethylene (Mw = 50000) and polystyrene (Mw = 100000 - 500000) standards. For the determination of comonomer contents in the ethene--olefin copolymers 13C NMR spectroscopy (C2D4Cl2, 130°C) was used. Elemental analyses were performed at the Microanalytical Department of the University of Groningen. Found values are the average of at least two independent determinations.§

The compounds CpTiCl**3**,1 CpTi(CH2Ph)**3**,2 Cp(*t*-Bu2C=N)TiCl2,3 Cp(*t*-Bu3P=N)TiCl2,4 1,3-Ph2C2H4N2C=NH,5 1,3-(2,6-Me2C6H3)2C2H4N2C=NH,5 TIBAO,6 and B(C6F5)37 were prepared according to published procedures.

The lithiated guanidinate {[(CH2)5N]2C=N}Li was generated in situ by reaction of 1-piperidinecarbonitrile (1.11 g, 10 mmol) in 25 ml of THF with a solution of piperidyl lithium (0.91 g, 10 mmol) in 25 ml of THF at 0 ºC, and immediately used after preparation.

The lithiated ligands [1,3-Ph2C2H4N2C=N]Li and [1,3-(2,6-Me2C6H3)2C2H4N2C=N]Li were generated in situ by treating THF solutions of 1,3-Ph2C2H4N2C=NH or 1,3-(2,6-Me2C6H3)2C2H4N2C=NH with equimolar amounts of n-BuLi (2.5M solution in hexane, Acros) and used without further purification.

**Synthesis of Cp{[(CH2)5N]2C=N}TiCl2 1a**

A solution of {[(CH2)5N]2C=N}Li (2.02 g, 10.00 mmol) in THF (50 ml) was added slowly to CpTiCl3 (2.20 g, 10.00 mmol) in THF (30 ml) at –80 ºC. The reaction mixture was warmed to room temperature and stirred for 2 h, after which the volatiles were removed in vacuum. The residue was extracted with boiling toluene (50 ml). Slow cooling to room temperature gave orange crystals, which were filtered off and dried in vacuum. Yield: 89.90 % (3.40 g, 8.99 mmol).

1H NMR (CDCl3): 1.5 – 1.6 (br, 12 H, C*H*2), 3.2 – 3.3 (br, 8 H,NC*H*2), 6.45 (s, 5H, C5*H*5). 13C{1H} NMR (CDCl3): 24.2 (*C*H2), 26.1 (*C*H2), 49.7 (N*C*H2), 115.3 (*C*5H5), 158.8 (N=*C*).

IR (cm-1): 3082 (w), 1651 (w), 1318 (s), 1272 (m), 1248 (s), 1211 (m), 1148 (w), 1156 (w), 1125 (m), 1110 (m), 1069 (w), 1024 (m), 1011 (m), 952 (w), 913 (m), 868 (w), 855 (m), 846 (m), 836 (m), 812 (vs), 794 (s), 731 (m), 651 (w), 635 (w), 514 (w), 455 (w), 425 (w).

Anal. for C16H25Cl2N3Ti (Mw = 378.18 g/mol) (calc.)found: C(50.82) 49.90, H(6.66) 6.70, N(11.11) 10.90.

**Synthesis of Cp[1,3-(2,6-Me2C6H3)2C2H4N2C=N]TiCl2 1b**

A solution of [1,3-(2,6-Me2C6H3)2C2H4N2C=N]Li (3.00 g, 10.00 mmol) in THF (50 ml) was added slowly to CpTiCl3 (2.20 g, 10.00 mmol) in THF (30 ml) at –80 ºC. The reaction mixture was warmed to room temperature and stirred for 2 h after which the solvent was removed in vacuum. The residue was extracted with boiling toluene (40 ml). Slow cooling to room temperature gave yellow-green crystals, which were filtered off and dried in vacuum. Yield: 90.28% (4.30 g, 9.03 mmol).

1H NMR (CDCl3): 2.51 (s, 12 H, C*H*3), 4.02 (s, 4 H, C*H*2), 5.95 (s, 5H, C5*H*5), 7.35 (d, 4 H, *J*HH = 2.9 Hz, C6*H*3), 7.26 (t, 2 H, *J*HH = 2.9 Hz, C6*H*3). 13C{1H} NMR (C6D6): 18.0 (*C*H3), 46.0 (*C*H2), 115.0 (*C*5H5), 128.7 (*C*6H3), 128.9 (*C*6H3), 134.9 (*C*6H3), 137.2 (*C*6H3), 150.4 (*C*N).

IR (cm-1): 3098 (w), 1595 (w), 1531 (m), 1377 (m), 1286 (m), 1256 (w), 1104 (vw), 1026 (vw), 1011 (w), 878 (m), 805 (m), 776 (w), 716 (m), 708 (m), 514 (vw), 415 (m).

Anal. for C24H27Cl2N3Ti (Mw = 476.28 g/mol) (calc.)found: C(60.52) 59.50, H(5.71) 5.80, N(8.82) 8.70.

**Synthesis of Cp(1,3-Ph2C2H4N2C=N)TiCl2 1b’**

A solution of (1,3-Ph2C2H4N2C=N)Li (1.43 g, 5.90 mmol) in THF (25 ml) was added slowly to CpTiCl3 (1.30 g, 5.90 mmol) in THF (30 ml) at –80 ºC. The reaction mixture was warmed to room temperature and stirred for 2 h after which the solvent was removed in vacuum. The residue was extracted with boiling toluene (40 ml). Slow cooling to room temperature gave yellow-orange crystals, which were filtered off and dried in vacuum. Yield: 81.08% (2.01 g, 5.24 mmol).

1H NMR (CDCl3): 2.92 (s, 4 H,C*H*2), 5.91 (s, 5 H, C5*H*5), 6.96 (t, 2 H, *J*HH = 7.7 Hz, p-C6*H*5), 7.29 (t, 4 H, *J*HH = 7.7 Hz, m-C6*H*5), 7.46 (d, 4 H, *J*HH = 7.7 Hz, o-C6*H*5). 13C{1H} NMR (CDCl3): 45.3 (N*C*H2), 116.0 (*C*5H5), 123.2 (Ph), 125.7 (Ph), 129.4 (Ph), 138.8 (Ph).#

IR (cm-1): 3080 (w), 1650 (w), 1537 (w), 1318 (w), 1296 (s), 1244 (w), 1222 (w), 1174 (w), 1155 (w), 1102 (vw), 1069 (vw), 1015 (w), 952 (vw), 913 (vw), 844 (m), 801 (m), 748 (s), 724 (s), 708 (m), 685 (m), 635 (vw), 504 (vw), 490 (w), 431 (w).

Anal. for C20H19Cl2N3Ti (Mw = 420.17 g/mol) (calc.)found: C(57.17) 55.95, H(4.56) 4.60, N(10.00) 9.95.

**Synthesis of Cp{[(CH2)5N]2C=N}Ti(CH2Ph)2 2a**

PhCH2MgBr (2.5 ml of a 2.0 M solution in Et2O) was added to a diethylether solution (40 ml) of Cp{[(CH2)5N]2C=N}TiCl2 (0.93 g, 2.50 mmol) at –80 ºC. After the addition was complete, the solution was warmed to room temperature and stirred for 12 h. The solvent was removed in vacuum and toluene (25 ml) was added to the residue. The slurry was filtered and the filtrate was pumped to dryness to gave the pure product (as seen by NMR spectroscopy) as dark red oil. Yield: 84.16 % (1.03 g, 2.04 mmol).

1H NMR (C6D6): 1.2 – 1.3 (br, 12 H, C*H*2), 2.73 (d, 2 H, *J*HH = 9.1 Hz, C6H5C*H*2), 2.78 (d, 2 H, *J*HH = 9.1 Hz, C6H5C*H*2), 2.99 (t, 8 H, *J*HH = 4.8 Hz, NC*H*2), 5.92 (s, 5H, C5*H*5), 6.91 (t, 2 H, *J*HH = 7.3 Hz, p-C6*H*5CH2), 7.07 (d, 4 H, *J*HH = 7.3 Hz, o-C6*H*5CH2), 7.23 (t, 4 H, *J*HH = 7.7 Hz, m-C6*H*5CH2). 13C{1H} NMR (C6D6): 24.7 (*C*H2), 26.1 (*C*H2), 49.7 (N*C*H2), 73.4 (Ph*C*H2), 113.6 (*C*5H5), 120.8 (Ph), 126.5 (Ph), 128.3 (Ph), 152.5 (Ph), 161.6 (N=*C*).

IR (cm-1): 3065 (m), 3054 (m), 3011 (s), 1592 (s), 1327 (s), 1245 (s), 1210 (s), 1176 (w), 1130 (m), 1109 (vw), 1067 (vw), 1026 (s), 973 (m), 914 (m), 852 (m), 804 (vs), 745 (s), 696 (s), 642 (m), 509 (vw), 464 (w), 427 (m).

**Synthesis of Cp[1,3-(2,6-Me2C6H3)2C2H4N2C=N]Ti(CH2Ph)2 2b (procedure A)**

PhCH2MgBr (13 ml of a 1.45M solution in Et2O) was added to a diethylether solution (50 ml) of Cp[1,3-(2,6-Me2C6H3)2C2H4N2C=N]TiCl2 (4.50 g, 9.45 mmol) at –80 ºC. After the addition was complete, the solution was warmed to room temperature and stirred for 12 h. The solvent was removed in vacuum and toluene (100 ml) was added to the residue. The slurry was filtered and the filtrate was pumped to dryness to gave the pure product as orange solid. Yield: 81.03% (4.50 g, 7.66 mmol).

1H NMR (C6D6): 2.44 (d, 2 H, *J*HH = 9.5 Hz, C6H5C*H*2), 2.60 (d, 2 H, *J*HH = 9.5 Hz, C6H5C*H*2), 2.62 (s, 12 H, C*H*3), 3.44 (s, 4 H, NC*H*2), 5.73 (s, 5H, C5*H*5), 6.98 (d, 4 H, *J*HH = 7.7 Hz, o-C6*H*5CH2), 7.16 (t, 2 H, *J*HH = 7.3 Hz, p-C6*H*5CH2), 7.25 (m, br, 6 H, C6*H*3), 7.46 (t, 4 H, *J*HH = 7.7 Hz, m-C6*H*5CH2). 1H NMR (THF-*d*8): 1.68 (d, 2 H, *J*HH = 9.1 Hz, C6H5C*H*2), 1.91 (d, 2 H, *J*HH = 9.1 Hz, C6H5C*H*2), 2.53 (s, 12 H, C*H*3), 4.04 (s, 4 H, NC*H*2), 5.08 (s, 5H, C5*H*5), 6.32 (d, 4 H, *J*HH = 7.0 Hz, o-C6*H*5CH2), 6.55 (t, 2 H, *J*HH = 7.3 Hz, p-C6*H*5CH2), 6.87 (t, 4 H, *J*HH = 7.7 Hz, m-C6*H*5CH2), 7.17 (s, br, 6 H, C6*H*3). 13C{1H} NMR (C6D6): 18.1 (*C*H3), 45.2 (*C*H2), 73.0 (Ph*C*H2), 113.8 (*C*5H5), 120.6 (Ph), 126.1 (Ph), 128.1 (Ph), 128.7 (*C*6H3), 129.0 (*C*6H3), 137.3 (*C*6H3), 137.9 (*C*6H3), 152.6 (Ph), 160.5 (*C*N).

IR (cm-1): 3054 (w), 1600 (m), 1549 (s), 1377 (m), 3101 (w), 1280 (m), 1252 (w), 1210 (m), 1027 (w), 1015 (w), 975 (w), 870 (m), 801 (w), 790 (m), 770 (w), 744 (m), 697 (m), 416 (w).

Anal. for C38H41N3Ti (Mw = 587.64 g/mol) (calc.)found: C(77.67) 75.90, H(7.03) 6.99, N(7.15) 7.05.

**Synthesis of Cp[1,3-(2,6-Me2C6H3)2C2H4N2C=N]Ti(CH2Ph)2 2b (procedure B)**

1,3-(2,6-Me2C6H3)2C2H4N2C=NH (0.50 g, 1.70 mmol) in toluene (20 ml) was added to a solution of CpTi(CH2Ph)3 (0.66 g, 1.70 mmol) in toluene (20 ml). The mixture was warmed to 50 ºC and stirred for 2 h. The solvent was pumped off and the residue was recrystallized from boiling hexane to give orange crystals. Yield: 91.09% (0.91 g, 1.53 mmol). The 1H NMR spectra of **2b** (procedure **B**) was identical with the one observed by using procedure **A**.

**Synthesis of Cp(*t*-Bu2C=N)Ti(CH2Ph)2****2c**

A procedure analogous to that employed for preparing **2a** was used starting from Cp(*t*-Bu2C=N)TiCl2 (1.90 g, 5.86 mmol) and PhCH2MgBr (10.65 ml of a 1.1M solution in Et2O). The toluene filtrate was pumped to dryness to gave the pure product (as seen by NMR spectroscopy) as red-orange oil. Yield: 86.21% (2.20 g, 5.05 mmol).

1H NMR (C6D6):  = 1.11 (s, 18 H, C*H*3), 2.53 (d, 2 H, *J*HH = 9.9 Hz, C6H5C*H*2), 2.58 (d, 2 H, *J*HH = 9.9 Hz, C6H5C*H*2), 5.80 (s, 5H, C5*H*5), 6.90 (t, 2 H, *J*HH = 8.0 Hz, p-C6*H*5CH2), 6.98 (d, 4 H, *J*HH = 8.0 Hz, o-C6*H*5CH2), 7.20 (t, 4 H, *J*HH = 8.0 Hz, m-C6*H*5CH2). 13C{1H} NMR (C6D6): 30.7 (*C*H3), 46.6 (Me3*C*), 81.3 (Ph*C*H2), 115.1 (*C*5H5), 121.8 (Ph), 126.2 (Ph), 128.6 (Ph), 151.1 (Ph), 160.6 (*C*N).

IR (cm-1): 3058 (m), 1631 (w), 1377 (s), 1364 (s), 1302 (w), 1208 (s), 1177 (w), 1152 (vw), 1090 (vw), 1067 (vw), 1017 (s), 961 (s), 930 (vw), 809 (vs), 746 (vs), 697 (s), 555 (w), 523 (vw), 430 (m).

**Synthesis of Cp(*t*-Bu3P=N)Ti(CH2Ph)2****2d**

A procedure analogous to that employed for preparing **2b** (procedure A) was used starting from Cp(*t*-Bu3P=N)TiCl2 (2.00 g, 5.00 mmol) and PhCH2MgBr (5 ml of a 2.0 M solution in Et2O). Recrystallisation from toluene/hexane (40/60) gave the pure product as red-orange crystals. Yield: 86.40 % (2.21 g, 4.30 mmol).

1H NMR (C6D6):  = 1.16 (d, 27 H, *J*PH = 13.2 Hz, C*H*3), 2.72 (d, 2 H, *J*HH = 9.5 Hz, C6H5C*H*2), 2.89 (d, 2 H, *J*HH = 9.5 Hz, C6H5C*H*2), 5.93 (s, 5H, C5*H*5), 6.92 (t, 2 H, *J*HH = 7.3 Hz, p-C6*H*5CH2), 7.06 (d, 4 H, *J*HH = 6.9 Hz, o-C6*H*5CH2), 7.25 (t, 4 H, *J*HH = 6.9 Hz, m-C6*H*5CH2). 13C{1H} NMR (C6D6): 29.6 (*C*H3), 41.3 (d, *J*PC = 46 Hz,Me3*C*), 70.0 (Ph*C*H2), 113.6 (*C*5H5), 120.8 (Ph), 126.2 (Ph), 128.3 (Ph), 153.4 (Ph). 31P{1H} NMR (C6D6):  = 35.06.

IR (cm-1): 3062 (m), 1652 (vw), 1591 (s), 1377 (s), 1248 (w), 1211 (m), 1191 (s), 1173 (w), 1124 (vs), 1018 (s), 969 (s), 936 (m), 886 (w), 833 (vw), 801 (vs), 747 (s), 699 (s), 650 (vw), 624 (s), 556 (w), 544 (w), 524 (w), 496 (m), 434 (w).

Anal. for C31H46NPTi (Mw = 511.56 g/mol) (calc.)found: C(72.78) 71.80, H(9.06) 8.99, N(2.74) 2.65.

**NMR tube reaction of Cp[1,3-(2,6-Me2C6H3)2C2H4N2C=N]Ti(CH2Ph)2 with B(C6F5)3 in C6D5Br**

B(C6F5)3 (5.1 mg, 10 mol) in 0.3 ml of C6D5Br was slowly added to a solution of **2b** (5.9 mg, 10 mol) in 0.4 ml of C6D5Br at 25 °C to yield the ionic complex {Cp[1,3-(2,6-Me2C6H3)2C2H4N2C=N]TiCH2Ph}+[PhCH2B(C6F5)3]- without noticeable byproducts.

1H NMR (C6D5Br):  2.23 (s, 12 H, C*H*3), 2.73 (s, 2 H,C6H5C*H*2Ti), 3.39 (s, br, 2 H,C6H5C*H*2B), 3.51 (s, 4 H, NC*H*2), 5.21 (s, 5H, C5*H*5), 6.29 (d, 2 H, *J*HH = 7.7 Hz, C6*H*5CH2), 6.83 (t, 2 H, *J*HH = 7.4 Hz, C6*H*5CH2), 6.90 – 7.25 (m, 12 H,Me2C6*H*3, C6*H*5CH2).

13C{1H} NMR (C6D5Br): 18.4 (*C*H3), 33.0 (br, B*C*H2), 46.6 (*C*H2*C*H2), 69.9 (Ti*C*H2), 112.8 (*C*5H5), 117.4 (Ph), 122.5 (Ph), 123.4 (Ph), 127.8 (*C*6H3), 128.8 (Ph), 129.7 (*C*6H3), 130.6 (Ph), 134.3 (*C*6H3), 135.7 (Ph), 137.5 (*C*6H3), 149.6 (Ph), 152.4 (Ph), 160.6 (*C*N).‡ 19F{1H} NMR (C6D5Br): -131.1 (d, *o*-F), -164.4 (t, *p*-F), -167.2 (t, *m*-F).

**General procedure for ethene polymerisation with Cp(L)Ti(CH2Ph)2 / B(C6F5)3**

The polymerisations were conducted in a fully temperature and pressure controlled 500 ml stainless steel autoclave reactor at 80 °C in the batch mode.

The reactor was dried at 120 °C under vacuum for 1 h. Then the reactor was charged with 190 ml of toluene, stirred at 600 rpm and thermostated at the desired temperature. 10 ml of a 0.0011 molar toluene solution of B(C5F5)3 was added and the autoclave was pressurized with ethene to reach 5 bar total pressure. Then 10 ml of a 0.001 molar toluene solution of the catalyst was injected. Ethylene pressure was kept constant with replenishing flow. After 15 min run time ethanol was injected to stop the polymerisation. The polymer was separated by filtration and dried for 24 h at 80 °C under vacuum.

**General procedure for ethene polymerisation with Cp(L)Ti(CH2Ph)2 / B(C6F5)3 + TIBAO**

The polymerisations were conducted in a fully temperature and pressure controlled 1000 ml stainless steel autoclave reactor at 80 °C in the batch mode.

The reactor was dried at 120 °C under vacuum for 1 h. Then the reactor was charged with 240 ml of toluene, stirred at 600 rpm and thermostated at the desired temperature. 10 ml of a toluene solution of TIBAO (0.02 M in Al) was added and the autoclave was pressurized with ethene to reach 5 bar total pressure. Then 10 ml of a 0.001 molar toluene solution of the pre-mixed catalyst/activator (Ti / B(C5F5)3 ratio of 1/1.1) was injected. Ethylene pressure was kept constant with replenishing flow.After 15 min run time ethanol was injected to stop the polymerisation. The polymer was separated by filtration, washed with aqueous HCl (6 n) and ethanol and dried for 24 h at 80 °C under vacuum.

**General procedure for ethene/-olefin copolymerisation with 2b / B(C6F5)3**

The polymerisations were conducted in a fully temperature and pressure controlled 500 ml stainless steel autoclave reactor at 80 °C in the batch mode.

The reactor was dried at 120 °C under vacuum for 1 h. Then the reactor was charged with 190 ml of toluene, stirred at 600 rpm and thermostated at the desired temperature. 20 ml of the -olefin (1-hexene, styrene) and 10 ml of a 0.0011 molar toluene solution of B(C5F5)3 were added and the autoclave was pressurized with ethene to reach 5 bar total pressure. Then 10 ml of a 0.001 molar toluene solution of **2b** was injected. Ethylene pressure was kept constant with replenishing flow. After 15 min run time ethanol was injected to stop the polymerisation. The polymer was separated by filtration and dried for 24 h at 80 °C under vacuum (9.9 g polymer for 1-hexene, 4.9 g polymer for styrene).

**Propene polymerisation with 2b / B(C6F5)3**

The polymerisations were conducted in a fully temperature and pressure controlled 500 ml stainless steel autoclave reactor at 80 °C in the batch mode.

The reactor was dried at 120 °C under vacuum for 1 h. Then the reactor was charged with 190 ml of toluene, stirred at 600 rpm and thermostated at the desired temperature. 10 ml of a 0.0011 molar toluene solution of B(C5F5)3 was added and the autoclave was pressurized with propene to reach 3 bar total pressure. Then 10 ml of a 0.001 molar toluene solution of **2b** was injected. Propene pressure was kept constant with replenishing flow. After 15 min run time ethanol was injected to stop the polymerisation. The polymer was separated by removing all volatile under reduced pressure and drying the residue for 24 h at 80 °C under vacuum to yield 35.9 g polypropene.

# Notes and References

§ For many of the organotitanium compounds described here, the carbon analyses are consistently and reproducibly too low, even for single-crystal quality batches that show no impurities by NMR spectroscopy. The H and N data for these samples do give the expected values. It is likely that the formation of inert Ti-carbide species during the combustion analysis is responsible for the low observed carbon contents.

# A signal for the C=N carbon atom was not observed.

‡ All CF references were excluded.

1. R. B. King and J. J. Eisch *J. Organomet. Synth.*, 1965, **1**, 78.
2. M. Mena, M. A. Pellinghelli, P. Royo, R. Serrano and A. Tiripicchio *J. Chem. Soc., Chem. Commun.* 1986, 1119.
3. J. McMeeking, X. Gao, R. P. v.H. Spence, S. J. Brown and D. D. Jeremic, *World Pat.*,WO 9914250, 1999 (Nova Chemicals).
4. D. W. Stephan, J. C. Stewart, F. Guérin, R. E. v.H. Spence, W. Xu and D. G. Harrison, *Organometallics*,1999, **18**, 1116; D. W. Stephan, J. C. Stewart, S. J. Brown, J. W. Swabey and Q. Wang, *Eur. Pat.,* EU 0881233, 1998, (Nova Chemicals).
5. L. Toldy, M. Kürti and I. Schäfer, *Ger. Pat.,* DE 2916140, 1979 (Egyt Gyo. Gyar.).
6. J. F. van Baar, P. A. Schut, A. D. Horton, T. Dall’occo and G. M. M. van Kessel, *World Pat.* WO0035974, 2000 (Montell).
7. A. G. Massey and A. J. Park, *J. Organomet. Chem.*, 1964, **2**, 245.
